# Supplementary material
Source: PubMed Central journal article supplement (PMC2947910)
Supplement: 1002867107_pnas.1002867107_SI.pdf [file 1002867107_pnas.1002867107_SI.pdf]

# Supporting Information

Wolfe et al. 10.1073/pnas.1002867107

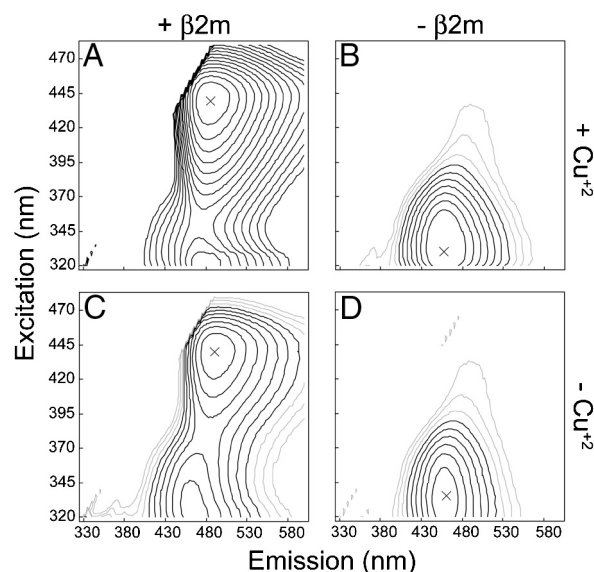

**Fig. S1.** Spectroscopic properties of ThT in the presence and absence of  $\beta 2m$ . These are 2D representations of excitation and emission spectra for  $\pm 100 \mu M \beta 2m$  and  $\pm 200 \mu M Cu^{2+}$ . Contour levels in all panels are drawn in decreasing intervals of  $10^c$ , where  $c = -0.1, -0.2, -0.3, \dots$ , relative to the maximum intensity of the hexamer ( $+\beta 2m + Cu^{2+}$ ). All contours with  $c < -1$  are drawn in gray. Samples additionally contained  $100 \mu M$  ThT,  $200 mM$  potassium acetate and  $25 mM$  MOPS at pH 7.4 and  $25^\circ C$ .  $10 mM$  EDTA was added to all  $-Cu^{2+}$  samples.

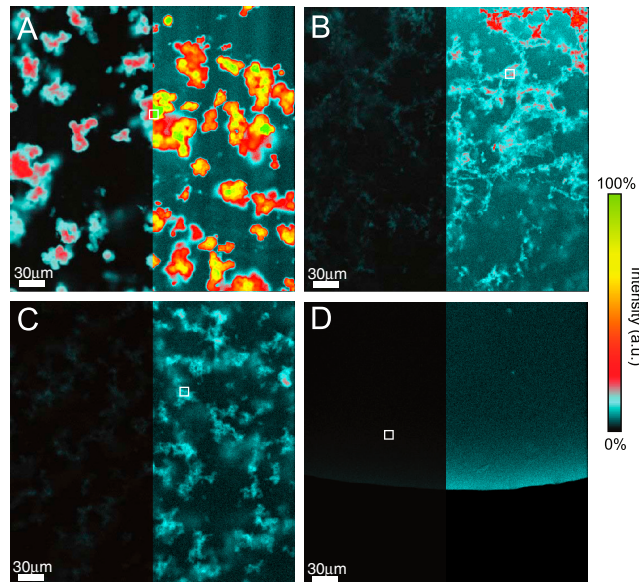

**Fig. S2.** Visualization of ThT in aggregates. False-color fluorescence images collected using blue (440 nm) excitation. (A) Amyloid fibers derived from human islet amyloid polypeptide (identical to image in Fig. 1B so as to facilitate comparison with Fig. S2 B–D). (B) Avidin-crosslinked membrane Nanodiscs containing 5% biotinylated lipids. (C) Avidin-crosslinked aggregates of biotin-labeled bovine serum albumin. (D) A droplet of a nonamyloidogenic sequence variant of islet amyloid polypeptide from rat in the same buffer as A. The right half of each image has had contrast increased for clarity. Ratiometric measures use signal integrated across the areas indicated with a white box. Ratios were computed using the same areas on images collected using 340 nm excitation. These ratios are  $\sim 15$ ,  $\sim 6$ , and  $\sim 5$  for A–D, respectively. Note that background regions in Fig. 1C–D also yield a ratio of  $\sim 6$ , indicating that this represents the instrumental response for ratiometric-based assessments at these wavelengths.

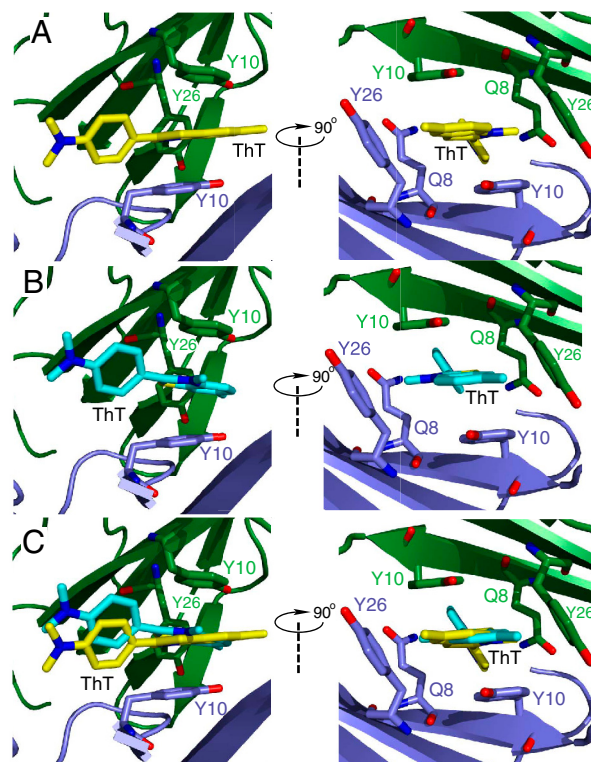

**Fig. S3.** Alternate conformations of ThT bound to  $\beta 2m_{\text{holo}}$ . (A) The side-view of ThT (yellow) bound at the  $\beta 2m_{\text{holo}}$  intersheet interface (Left) and the head-on view (Right). (B) The second ThT (cyan) conformation at the  $\beta 2m_{\text{holo}}$  intersheet interface viewed from the side (Left) and looking down the  $\phi$  axis (Right). (C) An overlay of both ThT conformations at the  $\beta 2m_{\text{holo}}$  intersheet interface.

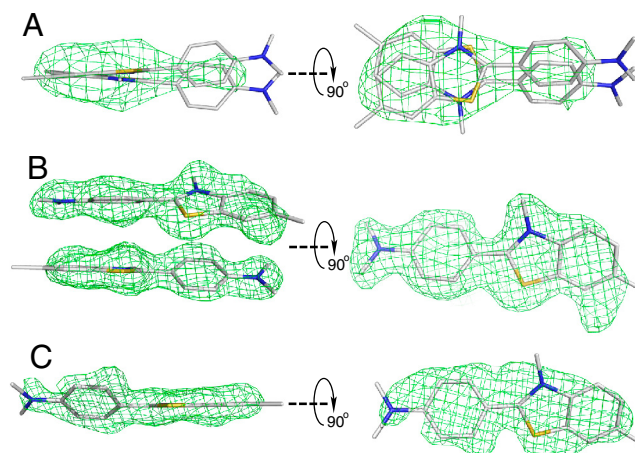

**Fig. S4.** The  $F_o - F_c$  electron difference density for ThT. (A) Difference density of ThT from  $\beta 2m_{\text{holo}}$ . Density around the benzothiazole ring is clearly apparent; however, clear density for the dimethylaminobenzene ring is not observed. (B and C) Difference density for the two ThT binding sites observed in  $\beta 2m_{\text{apo}}$ . Density for the entirety of two fluorophores can be seen for the first site (B) and the entirety of one fluorophore for the second site (C). For A–C, two panels are shown related by the indicated  $90^\circ$  rotation. In the right panel of B only the topmost ThT is shown for clarity. (A–C) All density is contoured at  $3\sigma$ .

**Table S1. Data and refinement statistics for  $\beta 2m_{\text{holo}}$  and  $\beta 2m_{\text{apo}}$**

|                                   | $\beta 2m_{\text{holo}}$         | $\beta 2m_{\text{apo}}$ |
|-----------------------------------|----------------------------------|-------------------------|
| Cell Dimensions (Å)               |                                  |                         |
| A                                 | 92.89                            | 48.55                   |
| B                                 | 116.59                           | 28.79                   |
| C                                 | 66.32                            | 74.13                   |
| Space Group                       | P2 <sub>1</sub> 2 <sub>1</sub> 2 | P2 <sub>1</sub>         |
| Resolution (Å)                    | 50-2.7                           | 50-1.6                  |
| $R_{\text{merge}}$                | 12.7 (92.2)                      | 8.2 (37.4)              |
| $I/\sigma I$                      | 11.8 (1.7)                       | 8.9 (1.6)               |
| Completeness (%)                  | 97.7 (87.4)                      | 98.3 (88.3)             |
| Redundancy                        | 6.5 (4.9)                        | 1.9 (1.6)               |
| Refinement                        |                                  |                         |
| Resolution                        | 50-2.7                           | 50-1.6                  |
| $R_{\text{work}}/R_{\text{free}}$ | 23.9/25.6                        | 18.6/22.1               |
| rms deviations                    |                                  |                         |
| Bond lengths                      | 0.013                            | 0.014                   |
| Bond angles                       | 1.4                              | 1.6                     |
